# Supplementary material
Source: MDPI journal article supplement (https://www.mdpi.com/2073-4395/9/7/397)
Supplement: s1 [file s1]

## Supplementary material

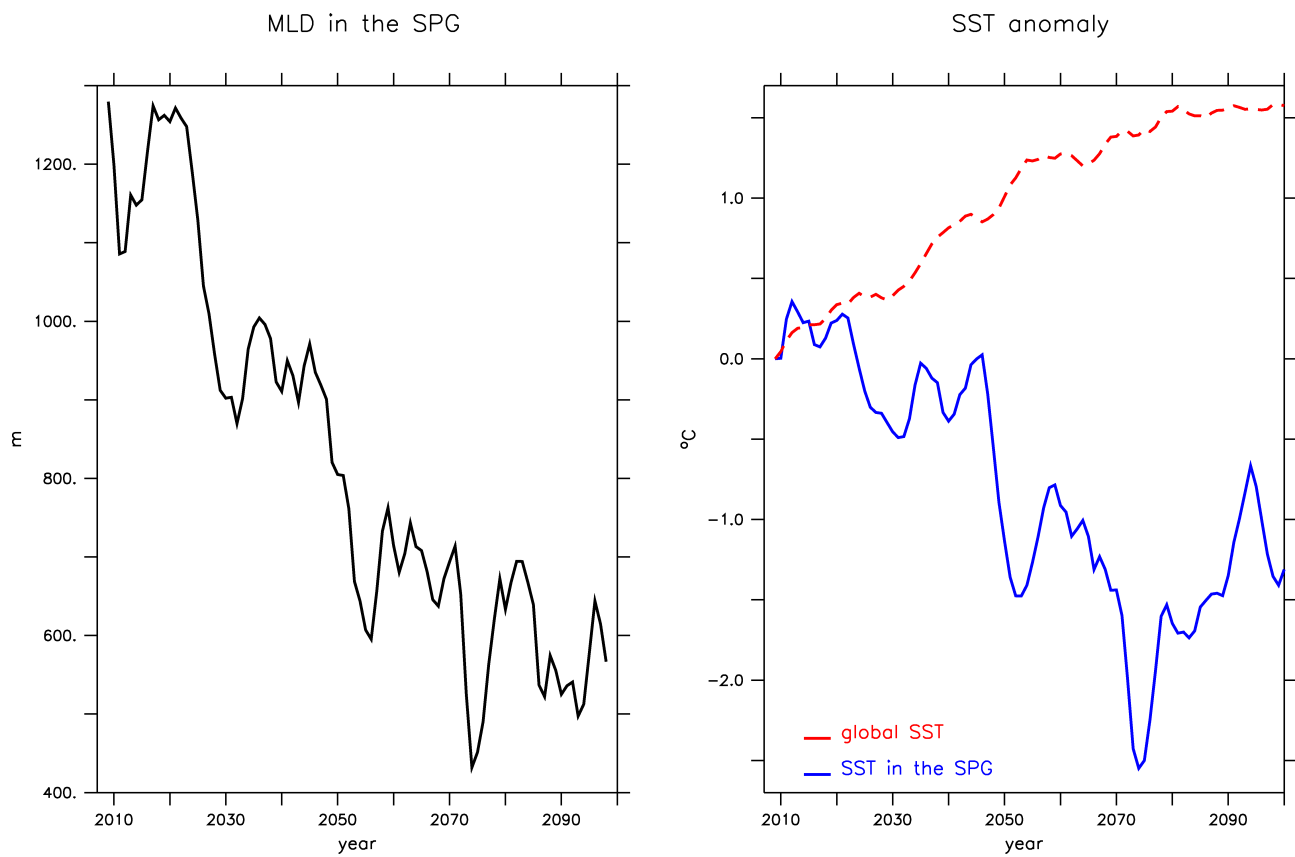

**Figure S1.** (a) Climate changes over the SPG regions as simulated by the downscaled CSIRO-Mk3-6-0 model for RCP4.5 scenario: (a) evolution of the Mixed Layer Depth (MLD, in *m*) in the SPG and (b) Sea Surface Temperature anomaly (SST, in °C) over the SPG. In (b) the dashed red line indicates the anomaly of the global mean SST.

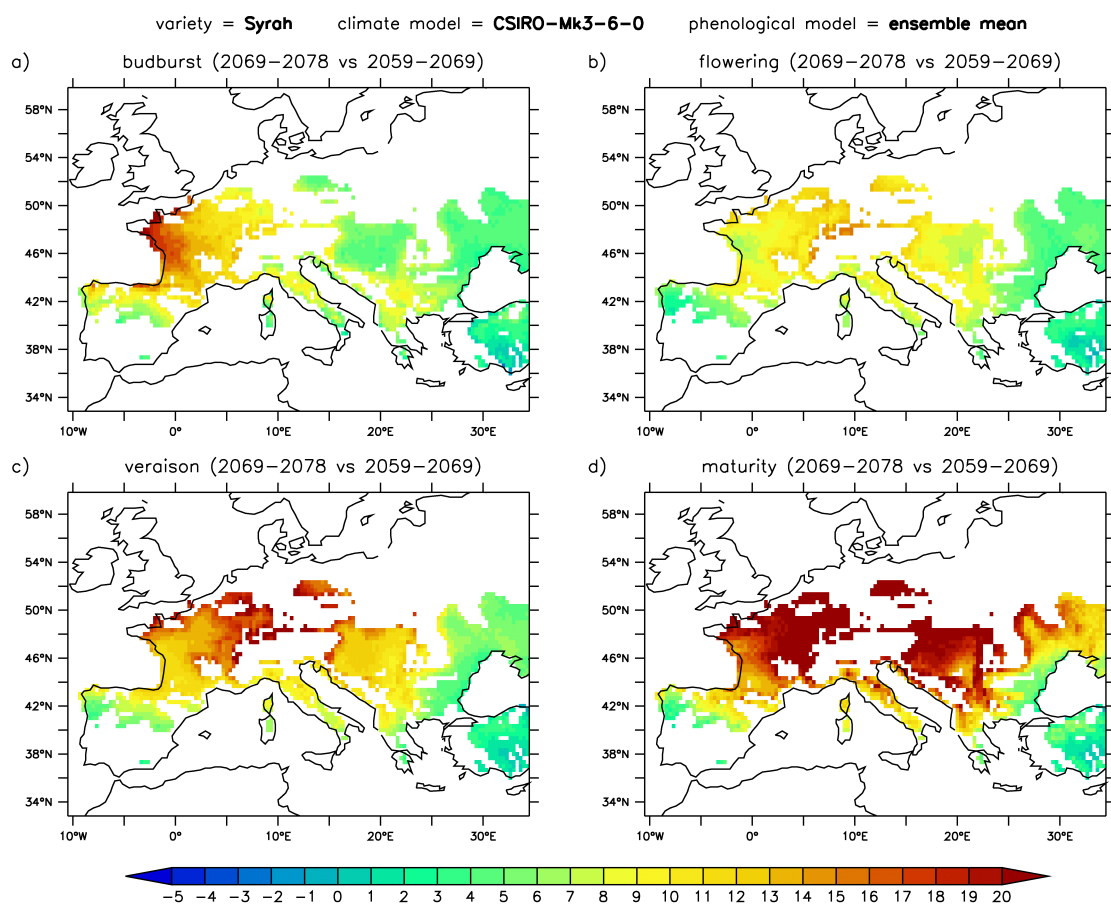

Figure S2. As Fig. 4 but for the Syrah variety.

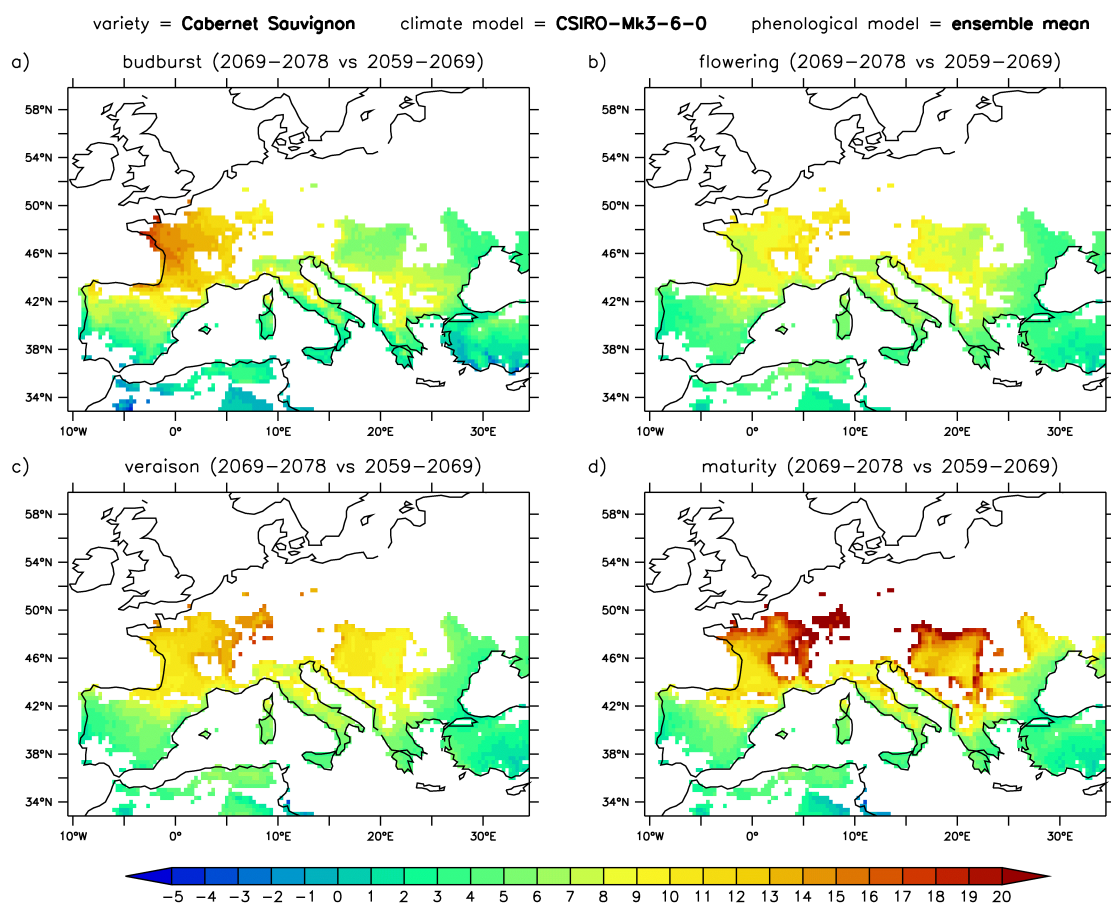

**Figure S3.** As Fig. 4 but for the Cabernet sauvignon variety.

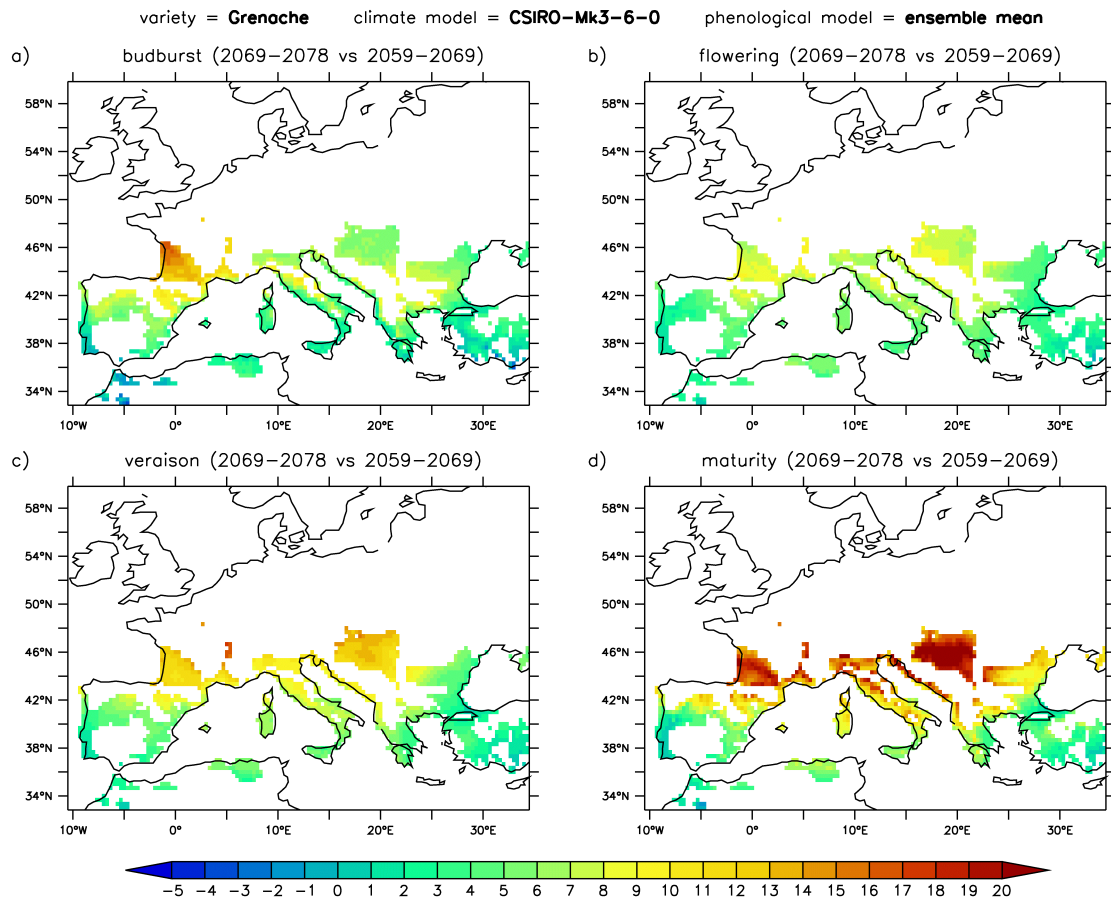

Figure S4. As Fig. 4 but for the Grenache variety.

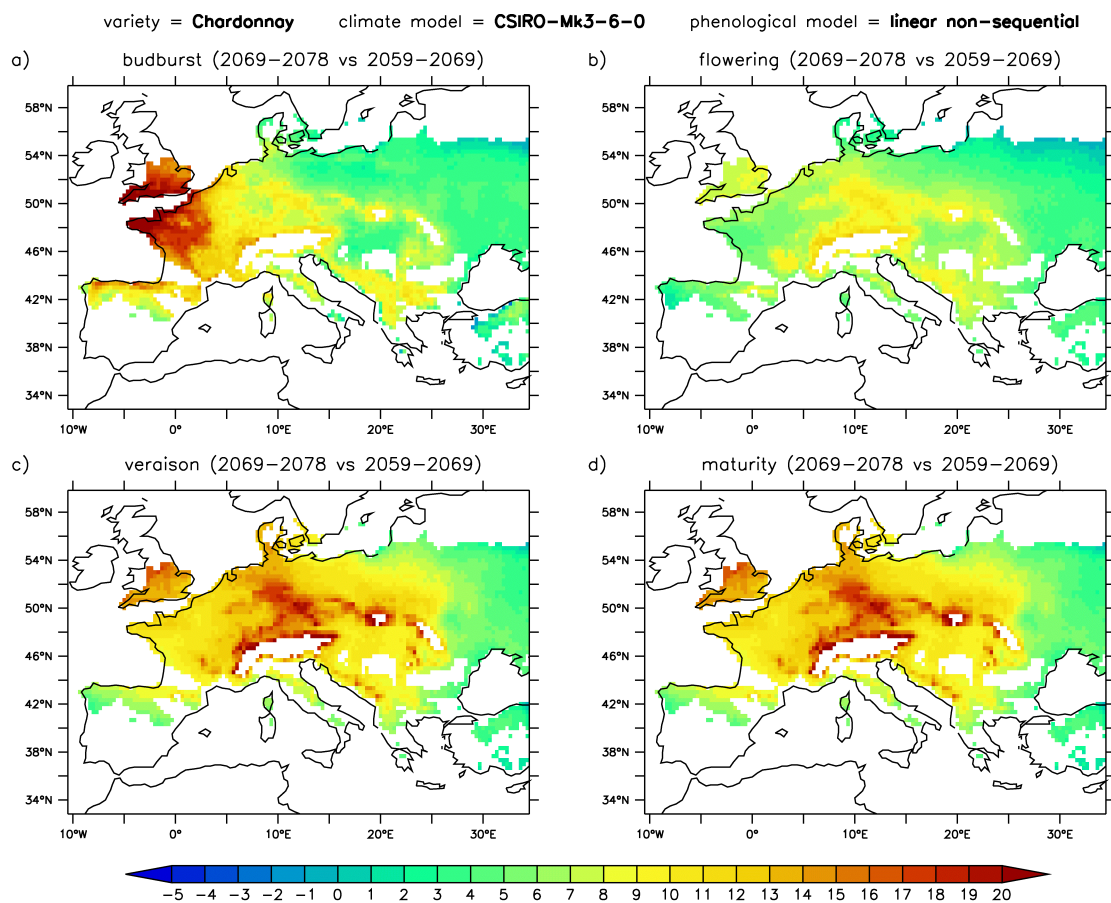

**Figure S5.** As Fig. 4 but with results based on the linear non-sequential phenological model.

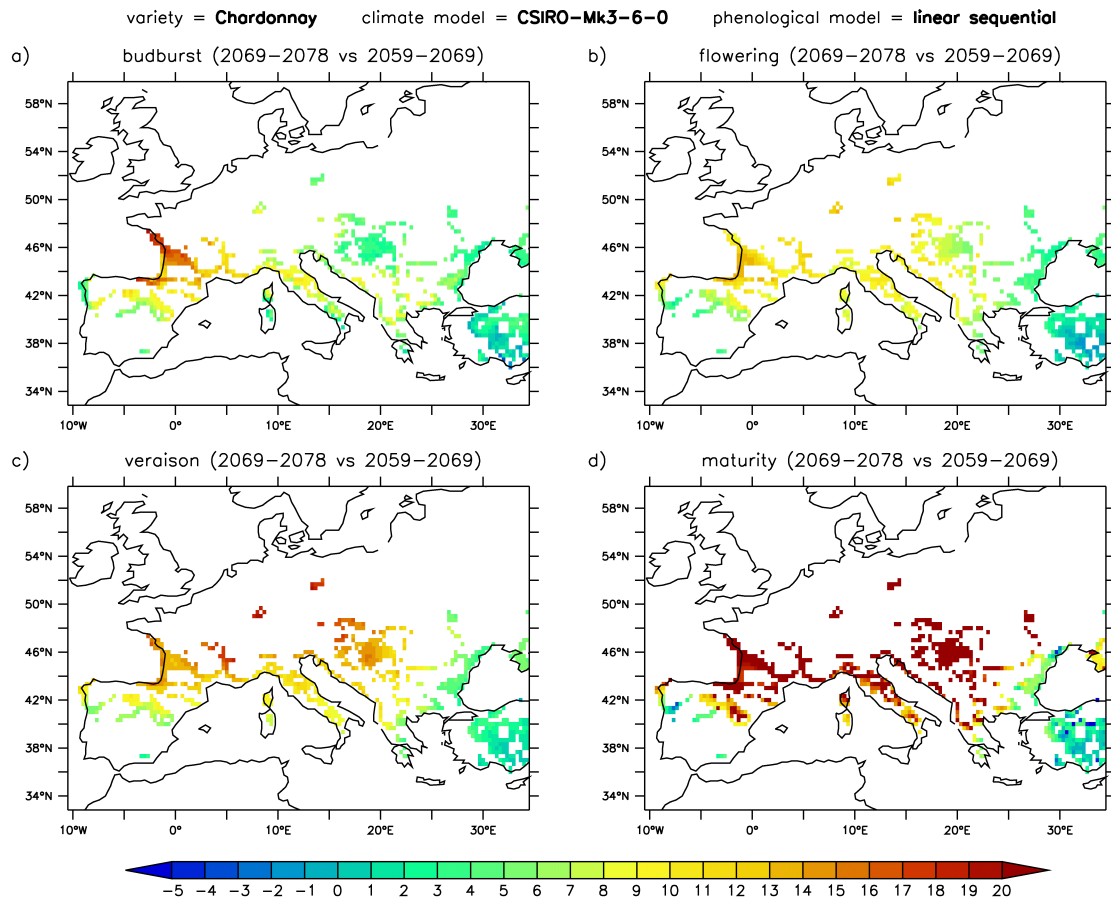

**Figure S6.** As Fig. 4 but with results based on the linear sequential phenological model.

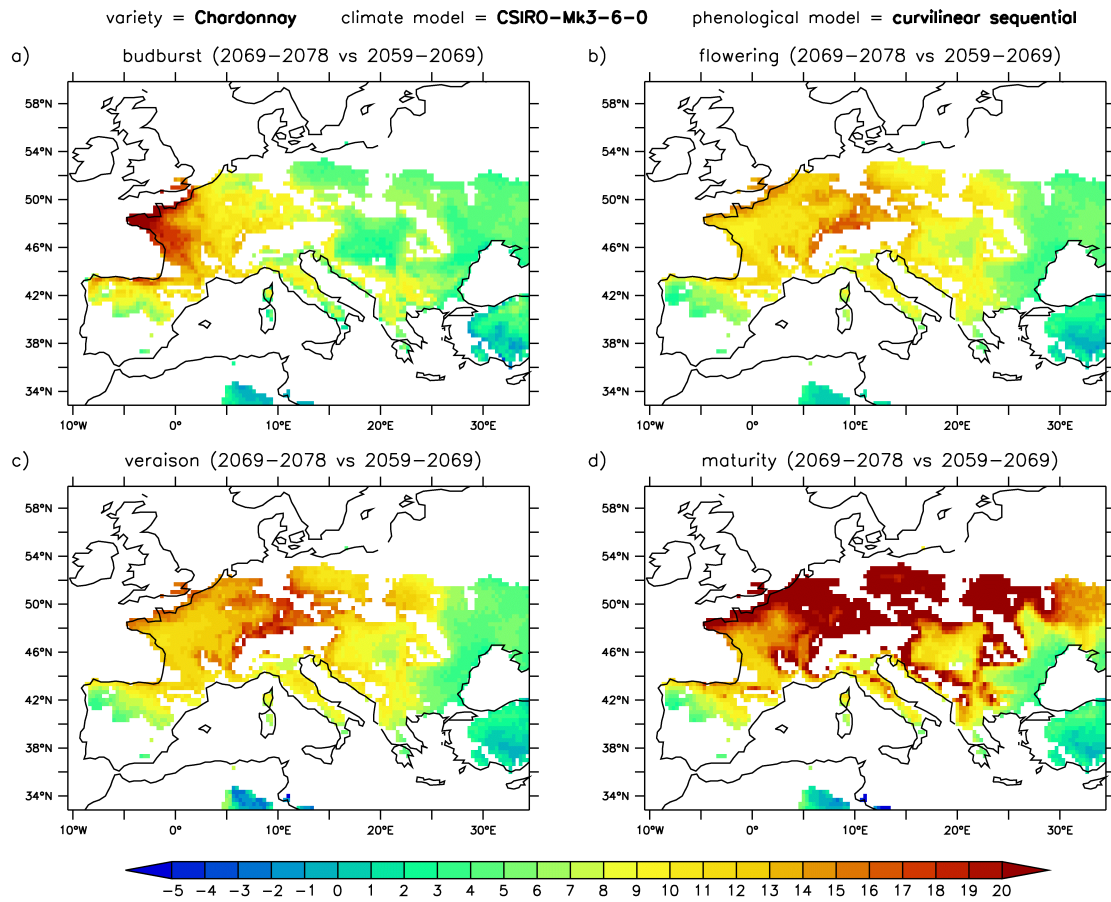

**Figure S7.** As Fig. 4 but with results based on the curvilinear sequential phenological model.

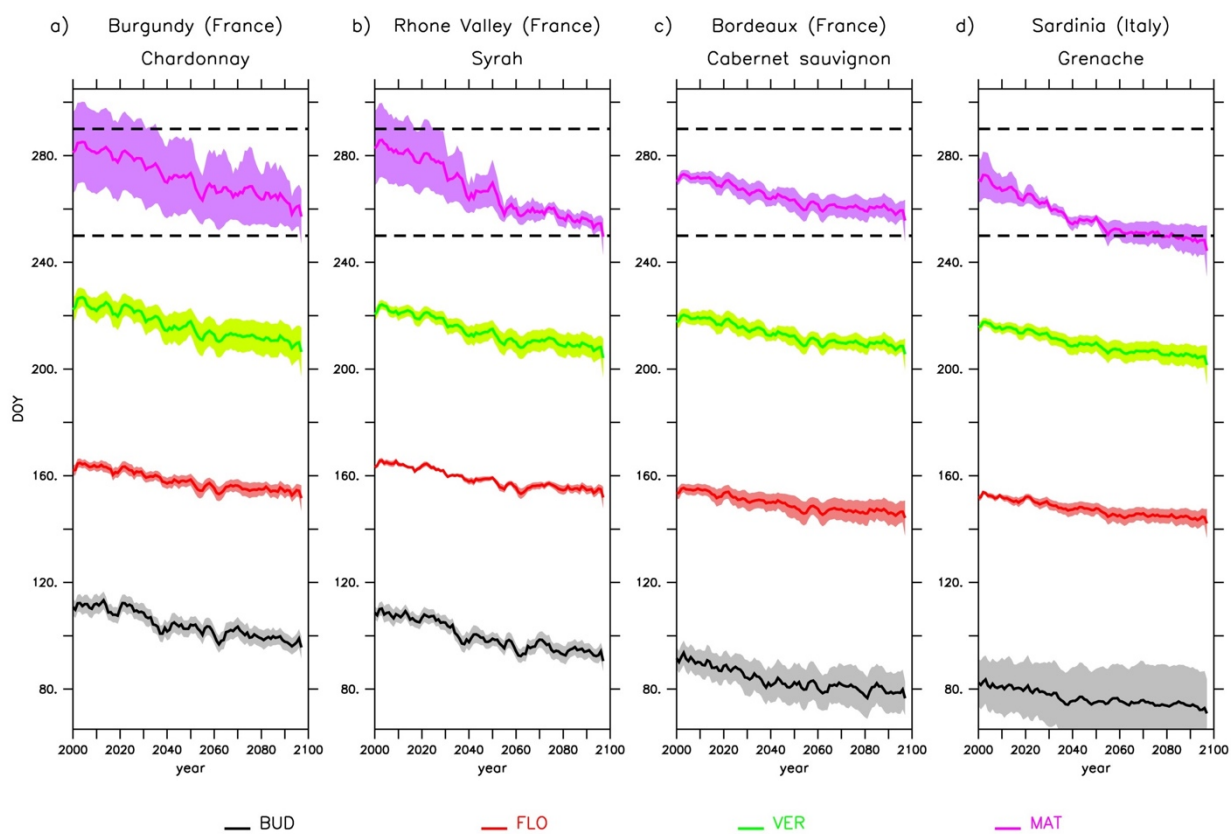

**Figure S8.** As Fig. 5 but with results based on the ensemble mean of climate model projections.

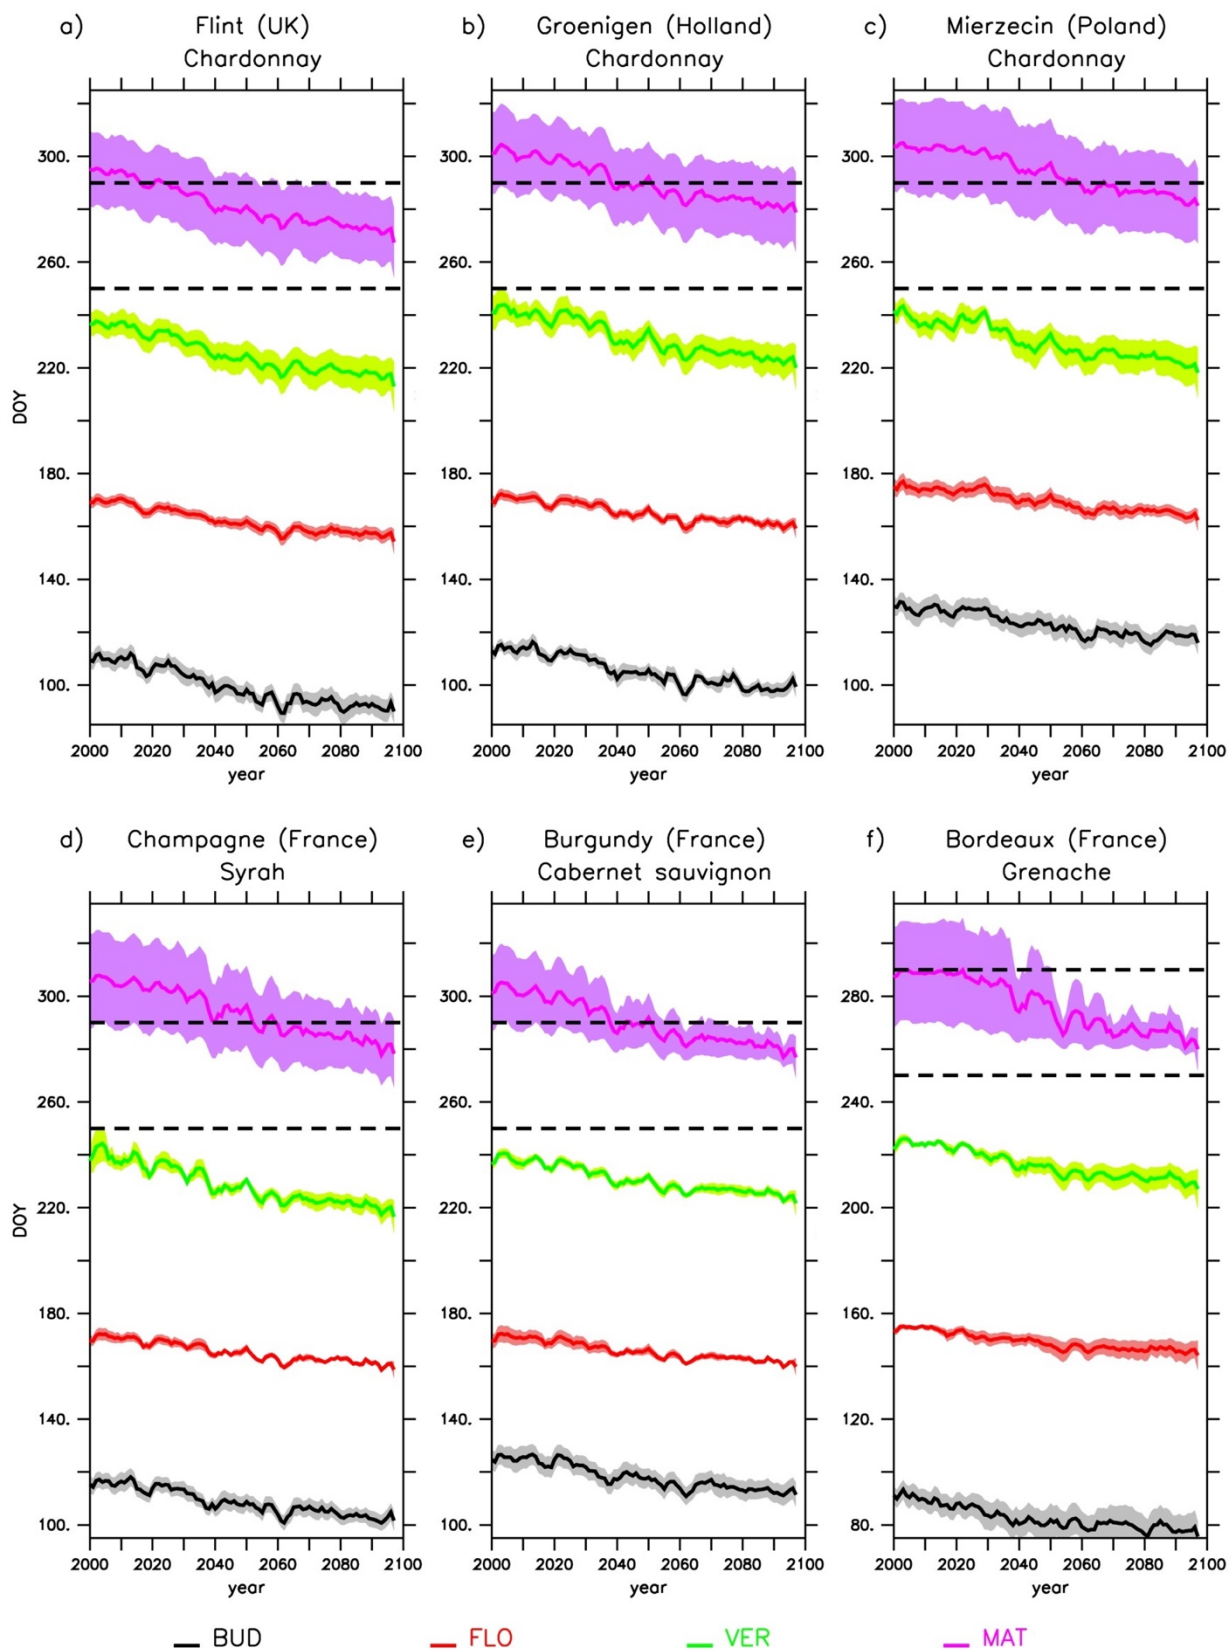

**Figure S9.** As Fig. 6 but with results based on the ensemble mean of climate model projections.

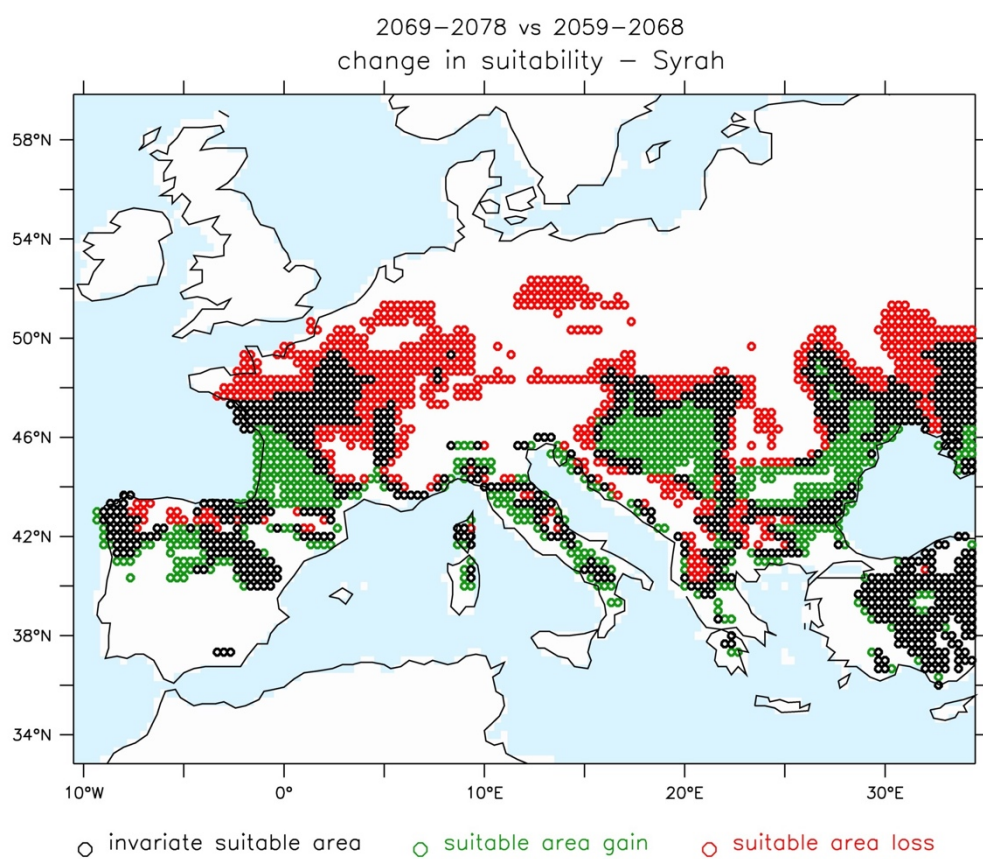

**Figure S10.** As Fig. 7 but for Syrah variety.

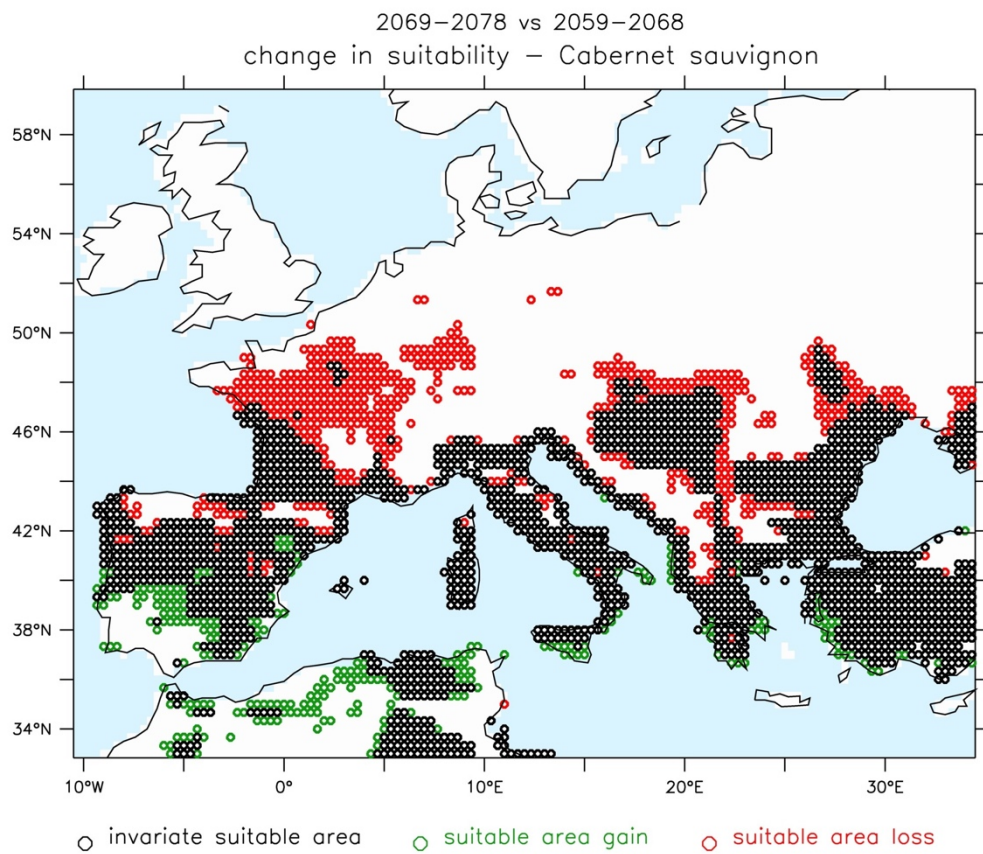

**Figure S11.** As Fig. 7 but for Cabernets sauvignon variety.

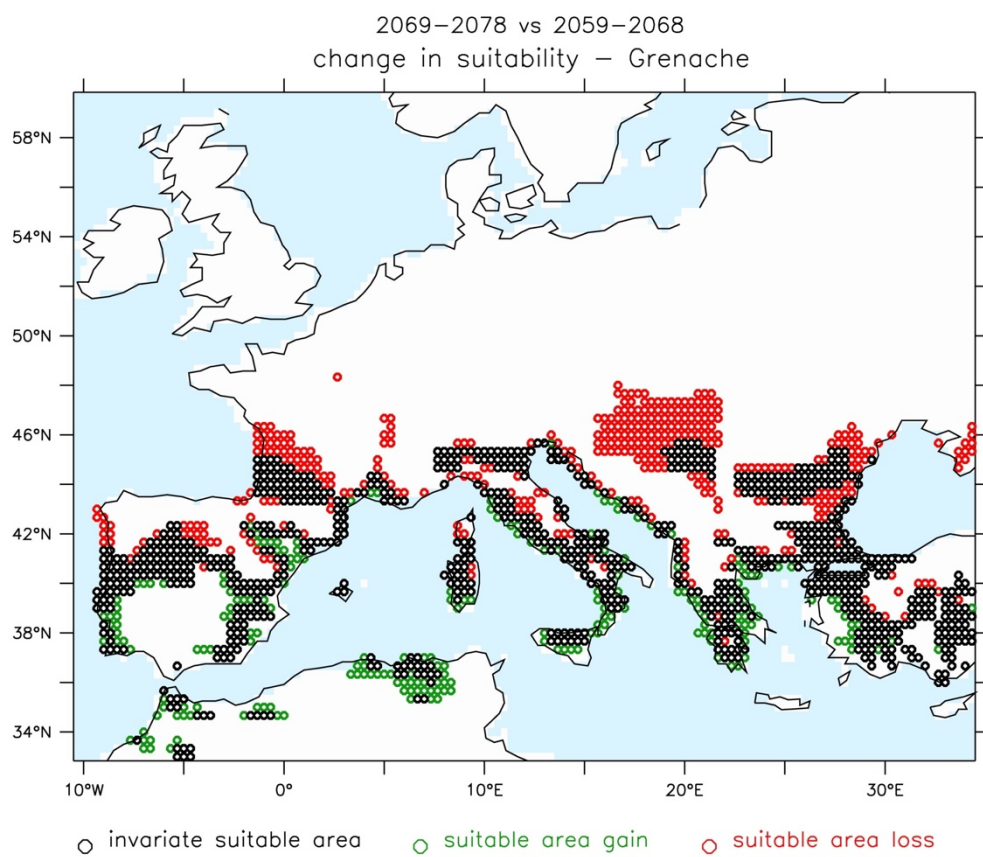

**Figure S12.** As Fig. 7 but for Grenache variety.

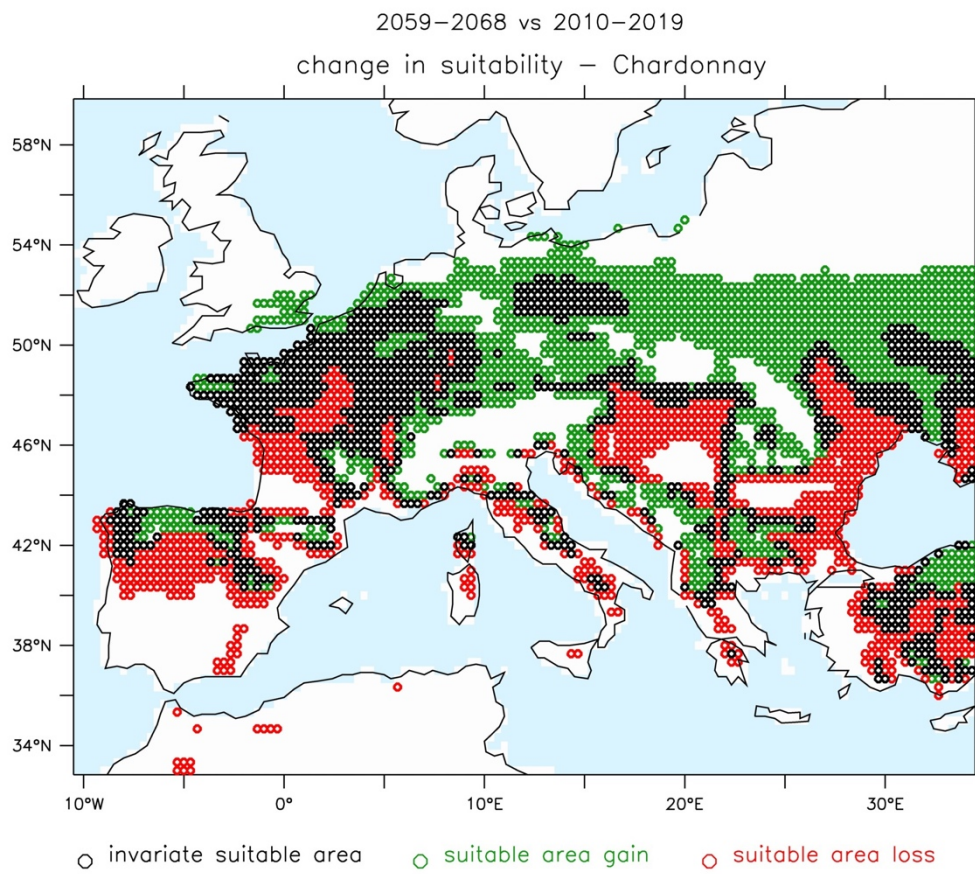

**Figure S13.** As for Fig. 7, but with anomaly calculated between 2059-2068 and 2010-2019.
